# Supplementary material for: Patterns and predictors of analgesic use in pregnancy: a longitudinal drug utilization study with special focus on women with migraine
Source: PubMed Central journal article supplement (PMC5512742; doi:10.1186/s12884-017-1399-0), 2017-07-14

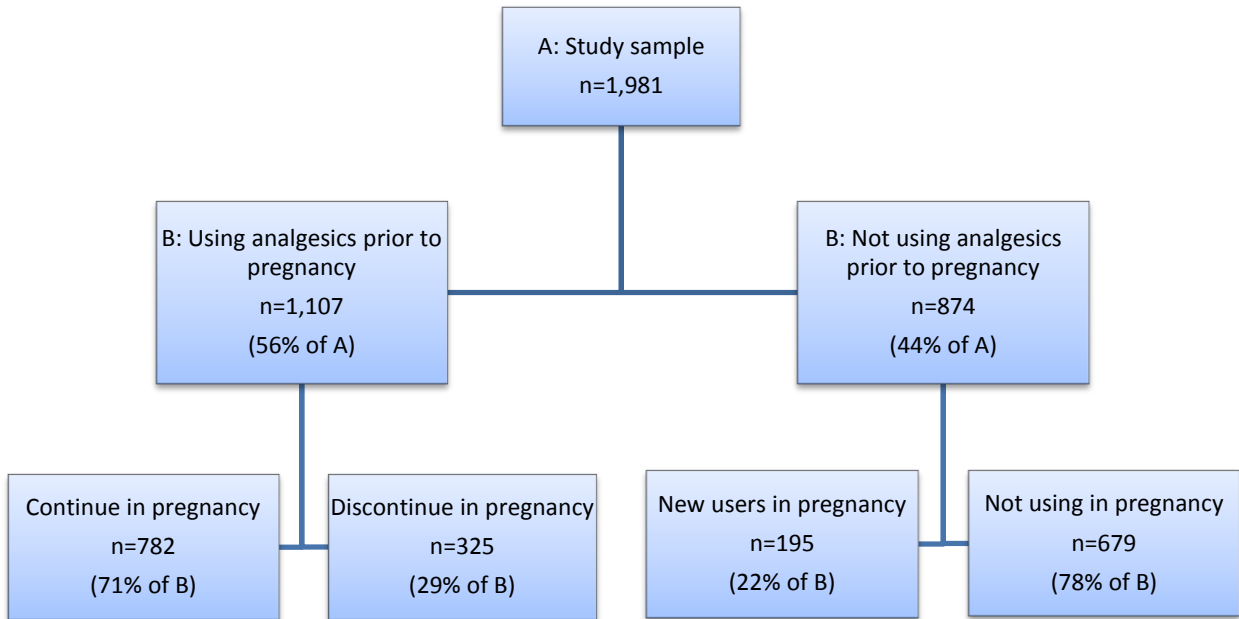

Supplement: 12884_2017_1399_MOESM2_ESM.pdf [file 12884_2017_1399_MOESM2_ESM.pdf]
