# Supplementary material for: Patterns and predictors of analgesic use in pregnancy: a longitudinal drug utilization study with special focus on women with migraine
Source: PubMed Central journal article supplement (PMC5512742; doi:10.1186/s12884-017-1399-0), 2017-07-14
Supplement: 12884_2017_1399_MOESM3_ESM.pdf [file 12884_2017_1399_MOESM3_ESM.pdf]

A: Women with migraine in the past month  
n=100

B: High headache intensity  
n=48  
(48% of A)

Analgesic use  
n=39  
(81% of B)

No analgesic use  
n=9  
(19% of B)

Paracetamol alone  
n=32  
(67% of B)

Paracetamol + other  
n=7  
(15% of B)
